# Supplementary material
Source: MDPI journal article supplement (https://www.mdpi.com/search?q=ijms-19-01595)
Supplement: s001 [file ijms-19-01595-s001.pdf]

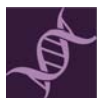

## Supplementary Information

### Dataset

```
1 #Information of DOT regions of protein-RNA complexes
2
3 #File format
4
5 #Protein-RNA complex --> free protein
6 #DOT residue name_Position of residue in protein-RNA complex
7 #Each entry is separated by "-----"
8
9 >2B63:A --> 3CQZ:A
10 VAL_2 GLY_3 GLN_4 GLN_5 MET_41 ASP_42 GLU_43 THR_44 GLN_45 THR_46
11 ARG_47 SER_249 ILE_250 SER_251 PHE_252 ASN_253 GLU_254 SER_255 GLN_256
12 ARG_257 GLY_258 GLU_259 ASP_260 ASP_261 LEU_262 ASP_305 ASN_306
13 ASP_307 ILE_308 ALA_309 GLY_310 GLN_311 PRO_312 GLN_313 ALA_314
14 LEU_315 GLN_316 LYS_317 SER_318 GLY_319 ARG_320 PRO_321 VAL_322
15 LYS_323 SER_324 ILE_325 ARG_326 ALA_327 ARG_328 LEU_329 LYS_330
16 GLY_331 LYS_332 GLU_333 GLY_334 ARG_335 ILE_336 ARG_337 GLY_338
17 ASN_339 LEU_340 MET_341 GLY_342 LYS_343 ARG_344 VAL_345 PHE_1389
18 ASN_1390 ARG_1391 SER_1392 ASN_1393 THR_1394 GLY_1395 ALA_1396
19 LEU_1397 VAL_1451 LYS_1452 TYR_1453 MET_1454 PRO_1455
20 -----
21 >4GZY:D --> 3EQL:N
22 PRO_208 ARG_209 ARG_210 VAL_211 ARG_212 VAL_213 GLU_214 TYR_215
23 VAL_216 THR_340 GLU_341 PRO_342 LYS_343 ASP_344 TYR_345 ARG_346
24 VAL_347 GLN_348 PRO_349 HIS_350 MET_351 ASN_352 VAL_353 VAL_354
25 VAL_355 PRO_356 GLU_357 GLY_358 ALA_359 ARG_360 VAL_361 GLU_362
26 ALA_363 GLY_364 ASP_365 LYS_366 ILE_367 VAL_368 ALA_369 ALA_370
27 ILE_371 ASP_372 PRO_373 GLU_374 GLU_375 GLU_376 VAL_377 ILE_378
28 ALA_379 GLU_380 ALA_381 GLU_382 GLY_383 VAL_384 VAL_385 HIS_386
29 LEU_387 HIS_388 GLU_389 PRO_390
30 -----
31 >4S20:C --> 5EZK:C
32 TYR_3 SER_4 TYR_5 THR_6 GLU_7
33 -----
34 >3AVU:A --> 3AGQ:A
35 ALA_2 GLU_3 ILE_4
36 -----
37 >1R9S:B --> 3CQZ:B
38 SER_248 ARG_249 PHE_250 TYR_431 MET_432 GLN_433 ARG_434 THR_435
39 VAL_436 GLU_437 ALA_713 GLU_714 ALA_715 TYR_866 GLY_867 MET_868
40 SER_869 ASN_881 THR_882 LEU_883 ASP_1100 ASP_1101 LYS_1102 ILE_1103
```

```
41 HIS_1104 ALA_1105 ARG_1106 ALA_1107 ARG_1108 GLY_1109 PRO_1110
42 MET_1111 GLN_1112 VAL_1113 LEU_1114 THR_1115 ARG_1116 GLN_1117
43 PRO_1118 VAL_1119 GLU_1120 GLY_1121 ARG_1122 SER_1123 ARG_1124
44 ASP_1125 GLY_1126 LYS_1174 LEU_1175 ASN_1176 ARG_1222 ASP_1223
45 PHE_1224
46 -----
47 >3ICQ:T --> 3IBV:B
48 ALA_794 PRO_795 GLN_796 GLY_797 THR_798 ALA_847 ASN_848 LEU_849
49 VAL_850 TRP_870 GLY_871 GLY_872 LYS_873 ASP_874 GLY_875 ILE_876
50 ALA_877 PRO_894 VAL_895 ASN_896 VAL_940 ASN_941 PHE_942 PRO_943
51 ASN_956 LEU_957 ASP_958 SER_959 ARG_960 SER_961 PHE_962 LYS_963
52 GLN_964 PHE_965 PHE_966 GLN_967 LYS_968 PHE_969 ILE_970 GLN_971
53 ALA_972 LEU_973 LYS_974 SER_975
54 -----
55 >2BYT:D --> 1OBH:A
56 GLY_154 LEU_155 VAL_156 ASN_157 TRP_158 CYS_159 PRO_160 LYS_161
57 CYS_162 GLN_163 THR_164 VAL_165 LEU_166 ALA_167 ASN_168 GLU_169
58 GLN_170 VAL_171 VAL_172 GLU_173 GLY_174 ARG_175 CYS_176 TRP_177
59 ARG_178 HIS_179 GLU_180 ASP_181 THR_182 PRO_183 VAL_184 GLU_185
60 LYS_186 ARG_187 GLU_188 LEU_189 GLU_440 ALA_441 CYS_442 GLY_443
61 ARG_466 PRO_467 LYS_468 GLY_469 LYS_470 LYS_486 CYS_487 GLY_488
62 GLY_489 PRO_490 ALA_491 ASP_815 VAL_816 VAL_817 GLU_818 VAL_819
63 ALA_820 VAL_821 GLN_822 VAL_823 ASN_824 GLY_825 ARG_826 VAL_827
64 ARG_828 GLY_829 THR_830 ILE_831 HIS_832 ILE_833 PRO_834 LYS_835
65 ASP_836 ALA_837 PRO_838 LEU_839 GLU_840 VAL_841 ALA_842 ARG_843
66 ALA_844 GLU_845 ALA_846 LEU_847 LYS_848 VAL_849 ARG_850 ASN_851
67 VAL_852 ARG_853 ALA_854 HIS_855 LEU_856 GLU_857 GLY_858 LYS_859
68 GLU_860 VAL_861 VAL_862 LYS_863 GLU_864 ILE_865 TYR_866 VAL_867
69 PRO_868 GLY_869 LYS_870 ILE_871 LEU_872 ASN_873 LEU_874 VAL_875
70 VAL_876
71 -----
72 >2F8S:A --> 1YVU:A
73 GLU_262 ASN_263 LEU_264 GLU_265 ASP_266 GLU_267 TYR_362 LYS_363
74 LYS_364 LEU_365 GLU_366 GLU_426 TYR_427 PRO_428 LYS_429 VAL_430
75 ASP_431 PRO_432 TYR_433 LYS_434 SER_435
76 -----
77 >3CIY:A --> 3CIG:A
78 ASN_550 PRO_551 GLY_552 GLY_553 PRO_554
79 -----
80 >3UZS:A --> 1YM7:D
81 GLU_490 GLU_491 ASP_492 LYS_543 ASN_544 LYS_545 GLN_546 LEU_547
82 GLY_548 HIS_549 GLU_550 GLU_551 PRO_571 PHE_572 LEU_573 LEU_657
```

```
83 VAL_658 GLN_659 ARG_660 VAL_661 PRO_662 LYS_663 MET_664 LYS_665
84 ASN_666 LYS_667 PRO_668 ARG_669 ALA_670 PRO_671
85 -----
86 >1F7U:A --> 1BS2:A
87 ALA_2 SER_3 THR_4
88 -----
89 >4A36:B --> 4A2P:A
90 THR_243 LYS_244 LYS_245 ASN_331 PHE_332 SER_333 ASN_334 VAL_335
91 ALA_401 SER_402 GLN_403 LEU_662 MET_663 GLY_664 ARG_665 GLY_666
92 MET_674 THR_675 LEU_676 PRO_677 SER_678 GLN_679 LYS_680 GLY_681
93 VAL_682 LEU_683 ASP_684 ALA_685 PHE_686 LYS_687 THR_688 SER_689
94 LYS_690 ASP_691 VAL_700 ALA_701 ASP_702 GLU_703 GLY_704 ILE_705
95 ASP_706 ILE_707 VAL_708 GLN_709 CYS_710 ARG_729 GLY_730 ARG_731
96 GLY_732 ARG_733 ALA_734 ALA_735 GLY_736
97 -----
98 >1YVP:A --> 1YVR:A
99 LYS_136 GLU_137 GLY_138 MET_139 LYS_140 CYS_141 GLY_142 MET_143
100 -----
101 >1H4S:A --> 1HC7:A
102 ARG_78 LYS_79 GLU_80 ALA_81 GLU_82 HIS_83 VAL_84 GLU_85 GLY_86
103 -----
104 >4YYE:B --> 4EO4:B
105 THR_119 ASP_120 GLU_121 GLU_122
106 -----
107 >3OVS:B --> 1UET:A
108 SER_89 TYR_90 GLU_91 ILE_92 ARG_93 TYR_94 ALA_95
109 -----
110 >5HC9:A --> 3H39:A
111 GLU_106 TYR_107 TYR_108 GLU_109 SER_110 PRO_111 ALA_112 LYS_113
112 LEU_114 PRO_115
113 -----
114 >1QZW:A --> 3KL4:A
115 GLU_308 GLU_309 TYR_310 ASP_311 LYS_312 ILE_313 GLN_314 LYS_315
116 LYS_316 MET_317 GLU_318 ASP_319 VAL_320 MET_321 GLU_322 GLY_323
117 LYS_324 GLY_325 LYS_326
118 -----
119 >1H3E:A --> 1H3F:A
120 THR_80 GLY_81 MET_82 ILE_83 GLY_84 ASP_85 PRO_86 SER_87 GLY_88 ARG_89
121 SER_90 LYS_91 THR_92 ARG_93 PRO_94 PRO_95 LEU_96 THR_97 LEU_98 GLU_99
122 GLU_100 GLY_348 GLY_349 ILE_350 PRO_351
123 -----
124 >1YTU:A --> 1W9H:A
```

```
125 MSE_2 GLU_3 TYR_4 LYS_5 ILE_6 VAL_7 GLU_8 ASN_9 GLY_10 LEU_144 SER_145
126 ASN_146 ARG_147 ASN_148
127 -----
128 >1HVV:H --> 2VG7:B
129 LYS_66 ASP_67 SER_68 THR_69 LEU_283 ARG_284 GLY_285 ARG_356 MET_357
130 ARG_358 GLY_359 ALA_360
131 -----
132 >3KFU:A --> 1N9W:A
133 VAL_94 GLU_95 ILE_96 PRO_97 LYS_98 GLU_99 GLU_100 TRP_101 ARG_102
134 ALA_103 ASN_104 PRO_105 ASP_106 THR_107 LEU_108 LEU_109 GLU_110
135 -----
136 >3V11:A --> 4M0L:B
137 SER_35 LYS_36 HIS_37 SER_38 GLU_39 GLU_40 LEU_41 LYS_42 ARG_43 GLY_44
138 PRO_226 GLY_227 THR_228 GLN_229 PHE_230 ASN_231 GLU_232 LEU_233
139 -----
140 >1Q2R:A --> 4Q4R:A
141 SER_126 HIS_127 LEU_128 ASP_129 GLY_130 SER_131 ARG_132 ARG_384
142 ASN_385 SER_386
143 -----
144 >3NMU:B --> 2NNW:A
145 LYS_297 ALA_298 LEU_299 PHE_300 ARG_301 HIS_302 LEU_303 ARG_304
146 THR_305 GLY_306 ALA_307 LYS_308 PRO_309
147 -----
148 >4RWP:A --> 1PX5:A
149 THR_48 ALA_49 ASP_50 GLY_64 LYS_65 GLY_66 THR_67 THR_68 LEU_69 ARG_70
150 GLY_71 ARG_124 ARG_125 GLU_126 ASN_127 PRO_128 ARG_129
151 -----
152 >1E1Y:A --> 1B70:A
153 LEU_6 ALA_7 ALA_8 ILE_9 GLN_10 ASN_11 ALA_12 ARG_13 ASP_14 LEU_15
154 GLU_16 GLU_17 LEU_18 LYS_19 ALA_20 LEU_21 LYS_22 ALA_23 ARG_24 TYR_25
155 LEU_26 GLY_27 LYS_28 LYS_29 GLY_30 LEU_31 LEU_32 THR_33 GLN_34 GLU_35
156 MET_36 LYS_37 GLY_38 LEU_39 SER_40 ALA_41 LEU_42 PRO_43 LEU_44 GLU_45
157 GLU_46 ARG_47 ARG_48 LYS_49 ARG_50 GLY_51 GLN_52 GLU_53 LEU_54 ASN_55
158 ALA_56 ILE_57 LYS_58 ALA_59 ALA_60 LEU_61 GLU_62 ALA_63 ALA_64 LEU_65
159 GLU_66 ALA_67 ARG_68 GLU_69 LYS_70 ALA_71 LEU_72 GLU_73 GLU_74 ALA_75
160 ALA_76 LEU_77 LYS_78 GLU_79 ALA_80 LEU_81 GLU_82 ARG_83 GLU_84 ARG_85
161 -----
162 >2ZZM:A --> 2YX1:B
163 LYS_69 ILE_70 ILE_71 LYS_72 LYS_73 PRO_74 SER_75 MLZ_81 MLZ_82 LYS_83
164 TYR_84 ARG_85 LYS_86 GLU_87 ILE_88 ASP_89 GLU_90 SER_138 GLU_139
165 VAL_140 LYS_141 GLY_142 GLU_143 PHE_144 ARG_145
166 -----
167 >3X1L:B --> 4H4K:A
```

```
168 LEU_13 PHE_14 ARG_15 GLU_16 SER_17 ARG_18 PRO_19 PHE_20 ASP_21 ALA_22
169 GLY_23 SER_24 GLU_25 SER_26 VAL_27 ALA_28 ARG_29 SER_30 ILE_31 LYS_49
170 GLY_50 LEU_51 LYS_52 ASN_53 CYS_54 VAL_55 GLY_56 VAL_57 GLY_58 GLU_59
171 GLU_142 LYS_143 GLU_144 LYS_145 ARG_146 ILE_147 GLY_148 ILE_149
172 LYS_150 LEU_151 SER_152 ARG_153 GLU_154 LYS_155 LYS_156 VAL_157
173 VAL_158 GLU_159 GLU_160 GLY_161 MET_162 LEU_163 TYR_164 THR_165
174 VAL_166 GLU_167 PHE_168
175 -----
176 >2GJW:A --> 1R0V:A
177 ILE_6 GLY_7 GLY_8 ASP_9 PHE_10 ALA_11 VAL_12 VAL_13 LYS_14 ALA_15
178 LYS_16 LYS_17 SER_18 LEU_19 GLU_20 ARG_21 ARG_22 GLY_23 PHE_24 GLY_25
179 VAL_26 LYS_27 ARG_28 GLY_29 ASP_30 LYS_31 ILE_32 TYR_33 LEU_34 HIS_35
180 PRO_36 LEU_37 GLU_38 VAL_39 VAL_40 TYR_41 LEU_42 GLN_43 ILE_44 LYS_45
181 GLY_46 ILE_47 GLU_48 SER_49 PHE_50 GLY_51 GLU_52 LEU_53 GLU_54 ASP_55
182 VAL_56 LEU_57 SER_58 TRP_59 ALA_60 GLU_61 SER_62 ARG_63 MET_64 GLU_65
183 -----
184 >1J1U:A --> 1U7D:B
185 ARG_132 SER_133 MET_134 GLU_135 LEU_136 ILE_137 ALA_138 ARG_139
186 GLU_140 ASP_141 GLU_142 ASN_143 GLN_173 ARG_174 LYS_175
187 -----
188 >4C9D:A --> 4C98:A
189 GLY_58 PRO_59 GLU_60 GLY_61 ALA_62 THR_63 LEU_64 LYS_65 LEU_88 GLU_89
190 ALA_90 ALA_91 PRO_92 ASP_93 GLY_94 LEU_95 PRO_96 LEU_97 GLY_98 ASP_99
191 PRO_149 GLY_150 GLY_151 ARG_152
192 -----
193 >3RW6:A --> 3RW7:D
194 ASN_118 TRP_119 PHE_120 LYS_121 ILE_122 THR_123 ILE_124 PRO_125
195 TYR_126 GLY_127 ARG_128 LYS_129 TYR_130 ASP_131 LYS_132 ALA_133
196 TRP_134 LEU_135 LEU_136 SER_137 MET_138 ILE_139 GLN_140 SER_141
197 LYS_142 CYS_143 SER_144 VAL_145 PRO_146 PHE_147 THR_148 PRO_149
198 ILE_150 GLU_151 PHE_152 HIS_153 TYR_154 GLU_155 ASN_156 THR_157
199 ARG_158 ALA_159 GLN_160 PHE_161 PHE_162 VAL_163 GLU_164 ASP_165
200 ALA_166 SER_167 THR_168 ALA_169 SER_170 ALA_171 LEU_172 LYS_173
201 ALA_174 VAL_175 ASN_176 TYR_177 LYS_178 ILE_179 LEU_180 ASP_181
202 ARG_182 GLU_183 ASN_184 ARG_185 ARG_186 ILE_187 SER_188 ILE_189
203 ILE_190 ILE_191 ASN_192 SER_193 SER_194 ALA_195 PRO_196 PRO_197
204 HIS_198 THR_199 ILE_200 LEU_201 ASN_202 GLU_203
205 -----
206 >4YVI:A --> 1UAJ:A
207 ASP_169 SER_170 PHE_171 ALA_172 ASP_173
208 -----
209 >2XBM:A --> 4R8S:A
210 GLY_3 SER_4 GLN_5 GLY_6
```

```
211 -----
212 >4LGT:D --> 4LAB:A
213 MET_1 SER_2 GLU_3 LYS_4 LEU_5 GLN_6 LYS_7 VAL_8 LEU_9 ALA_10 ARG_11
214 ALA_12 GLY_13 HIS_14 GLY_15 SER_16 ARG_17 ARG_18 GLU_19 ILE_20 GLU_21
215 SER_22 ILE_23 ILE_24 GLU_25 ALA_26 GLY_27 ARG_28 VAL_29 SER_30 VAL_31
216 ASP_32 GLY_33 LYS_34 ILE_35 ALA_36 LYS_37 LEU_38 GLY_39 ASP_40 ARG_41
217 VAL_42 GLU_43 VAL_44 THR_45 PRO_46 GLY_47 LEU_48 LYS_49 ILE_50 ARG_51
218 ILE_52 ASP_53 GLY_54 HIS_55 LEU_56 ILE_57 SER_58 VAL_59 ARG_60 GLU_61
219 -----
220 >3FTF:A --> 3FTC:A
221 MET_1 VAL_2 ARG_3 LEU_4 LYS_5 LYS_6 SER_7 PHE_8 GLY_9 GLN_10 HIS_11
222 -----
223 >3U56:A --> 3TG8:A
224 PRO_1 LYS_2 HIS_3 GLY_4 LYS_5 ARG_6 TYR_7 ARG_8 ALA_9 LEU_10 LEU_11
225 GLU_12 LYS_13
226 -----
227 >2R8S:H --> 4XH2:H
228 LYS_222 SER_223 CYS_224
229 -----
230 >4P3E:C --> 4P3F:A
231 ASN_138 THR_139 GLU_140 PRO_141
232 -----
233 >4YHW:A --> 4YHU:C
234 GLU_407 LEU_408 HIS_409 THR_410 ASN_411 THR_412 GLY_413 ASP_414
235 ILE_415 LYS_416 MSE_417 ASP_418 MSE_419 HIS_420 ASN_421
236 -----
237 >4OX9:Y --> 3P2K:A
238 SER_142 ASP_143 SER_144 TYR_145 GLU_146 GLU_147 ALA_148 GLU_149
239 ILE_150 LYS_151 LYS_152 ARG_153 GLY_154 LEU_155 PRO_156 LEU_157
240 LEU_158 SER_159 SER_217 LYS_218 HIS_219
241 -----
242 >4ADV:J --> 3W1Y:C
243 SER_54 PRO_55 HIS_56 VAL_57 ASN_58 LYS_59 ASP_60 ALA_61 ARG_62
244 -----
245 >3EQT:A --> 2W4R:D
246 PRO_594 VAL_595 VAL_596 ILE_597 ASN_598 LYS_599 VAL_600
247 -----
248 >1ZBI:A --> 1ZBF:A
249 GLY_194 ARG_195 LYS_196
250 -----
251 >4ERD:A --> 4EYT:A
252 GLU_520 PHE_521 ARG_522 LYS_523 PHE_524 PHE_525 PHE_526 MSE_527
253 LYS_528 LYS_529 GLN_530 GLN_531 LYS_532
```

```
254 -----
255 >2QUX:A --> 2QUD:B
256 ASP_66 SER_67 GLY_68
257 -----
258 >2CZJ:A --> 1WJX:A
259 TYR_63 GLU_64 LYS_65 GLY_66 SER_67 TYR_68 ALA_69 ASN_70
260 -----
261 >4V2S:A --> 3VU3:E
262 PRO_67 VAL_68 SER_69 HIS_70 HIS_71 SER_72 ASN_73 ASN_74
263 -----
264 >3WBM:A --> 2BKY:B
265 THR_5 PRO_6 THR_7 PRO_8
266 -----
267 >1URN:A --> 1NU4:A
268 ALA_2 VAL_3 PRO_4 GLU_5 THR_6
269 -----
270 >3MOJ:B --> 2G0C:A
271 LYS_414 LYS_415 ILE_416 ARG_417 LYS_468 GLY_469 LYS_470
272 -----
273
```

274 **Supplementary Figures**

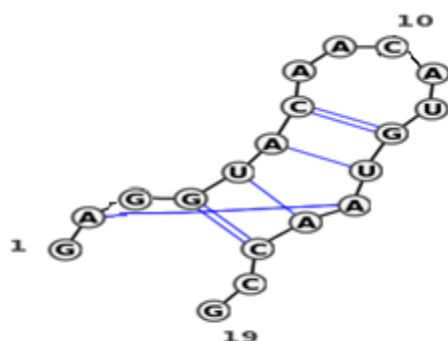

Seq: GAGGUACAACAUGUAACCG  
 Str: .{.(((.....))})..

275

276

277

278

**Figure S1.** Secondary structure of RNA represented by dot bracket notation. The dot (“.”) represents an unpaired nucleotide, (“(” and “)”) represents paired nucleotide and (“{” and “}”) represent pseudoknot nucleotide.

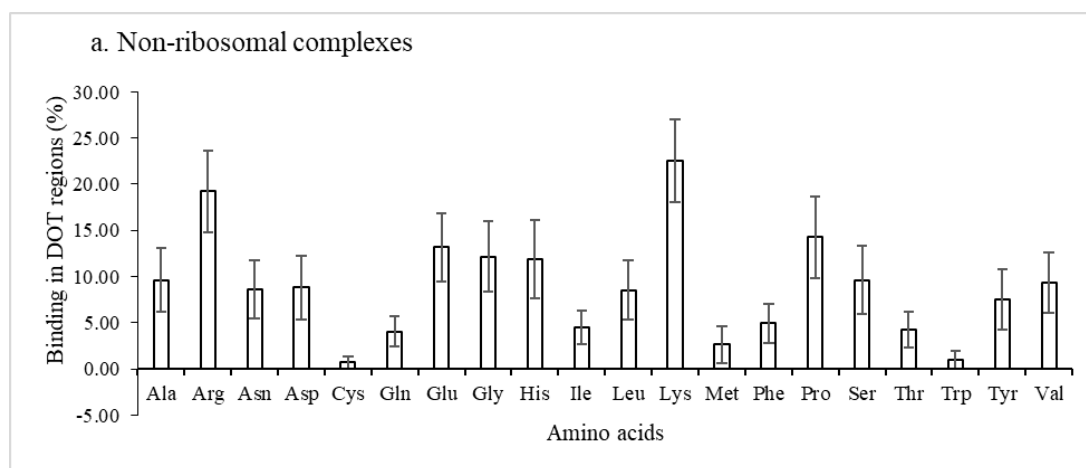

279

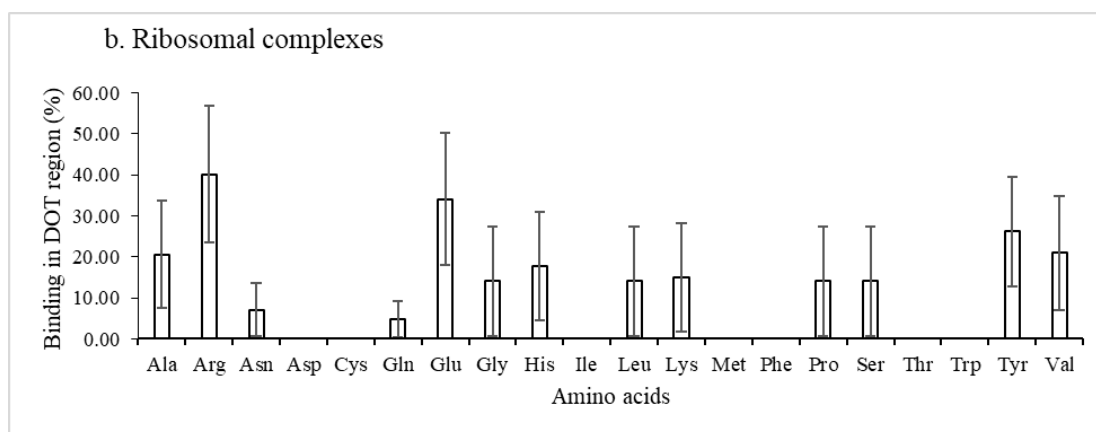

280

281

282

**Figure S2.** Frequency of binding of amino acids in DOT region for (a) non-ribosomal (NR6) and (b) ribosomal (RB6) protein-RNA complexes.



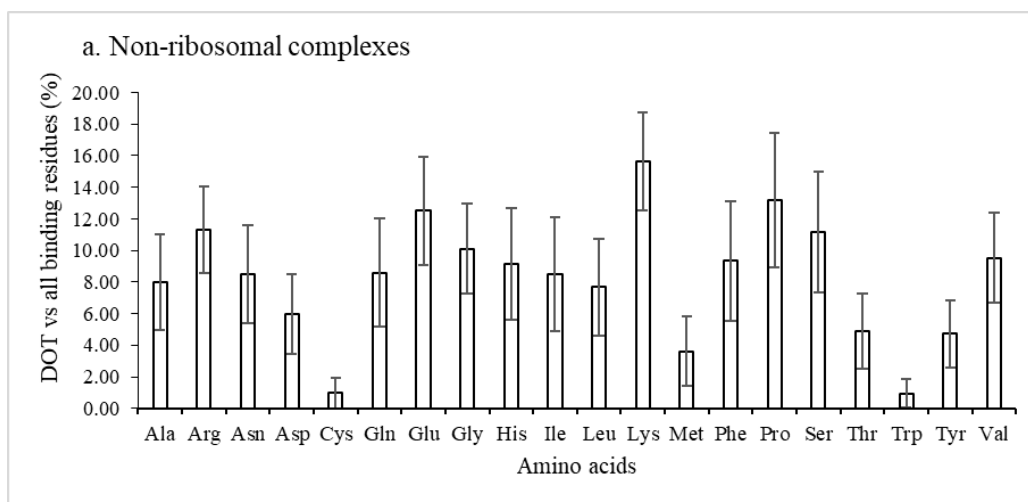

283

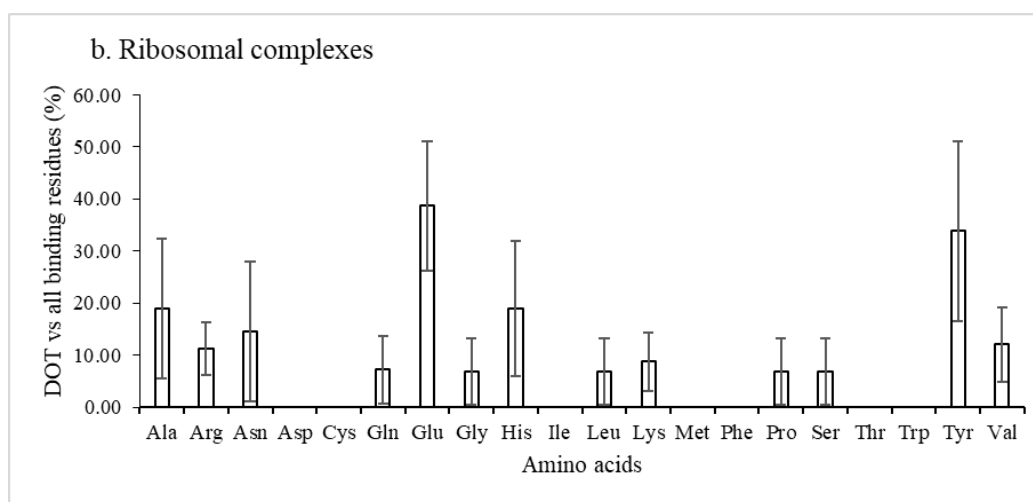

284

285

286

**Figure S3.** Frequency of binding in DOT regions than other binding residues in (a) non-ribosomal (NR6) and (b) ribosomal (RB6) protein-RNA complexes.

287

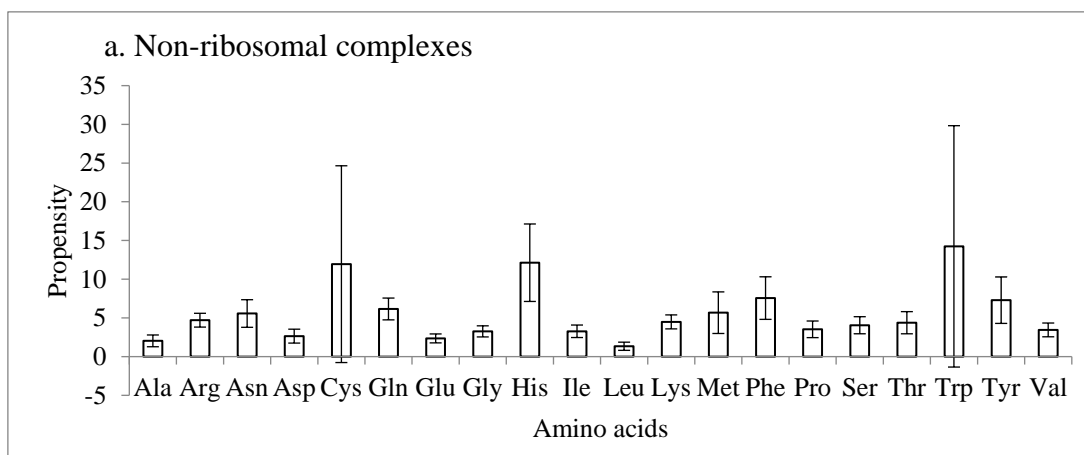

288

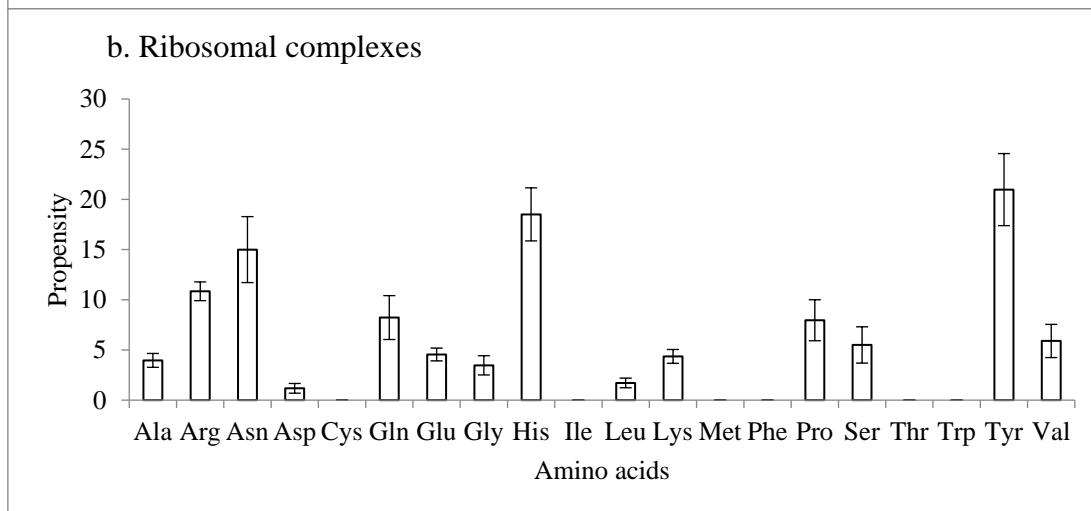

289

**Figure S4.** Propensity of binding in DOT region for (a). non-ribosomal and (b). ribosomal complexes using 6 Å distance cut-off for binding.

290

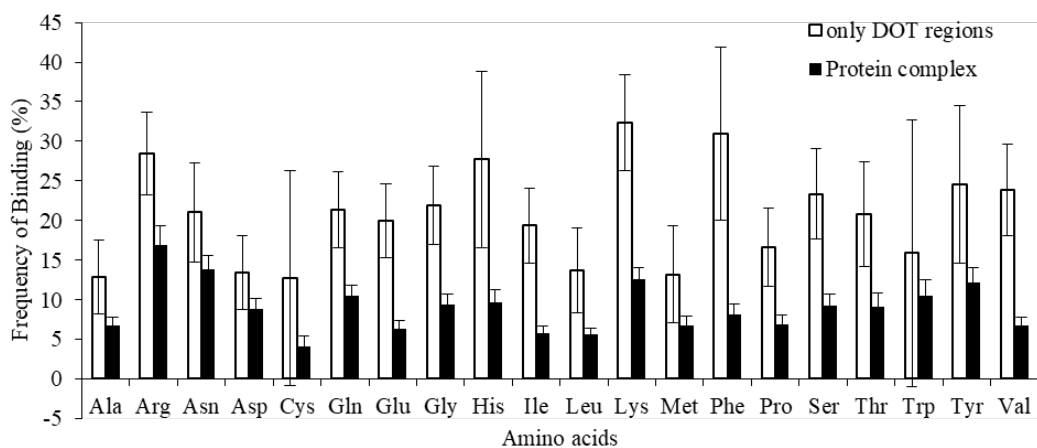

291

292

293

**Figure S5.** Comparison of binding frequency in DOT region and in complete protein using 6 Å distance cut-off for contact in NR6 dataset.

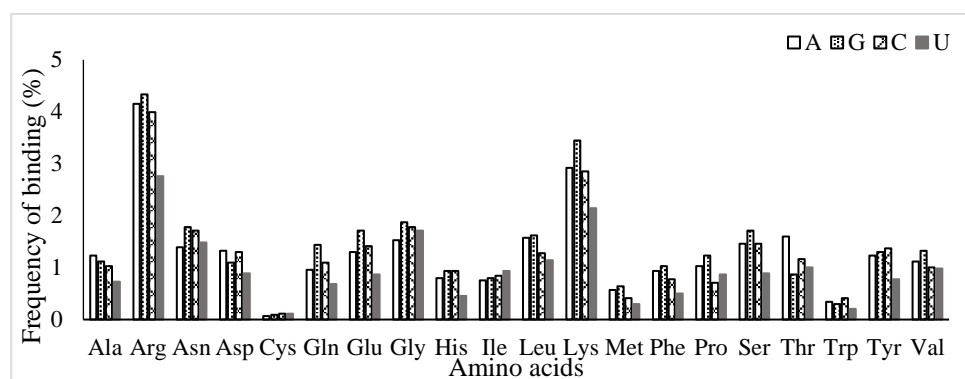

294

295

296

**Figure S6.** Frequency of binding of amino acids with nucleotides in non-ribosomal protein-RNA complexes using 6 Å distance for contact.

297

### Supplementary Tables

298

299

**Table S1.** Secondary structure of all DOT residues and residues in contact with RNA in DOT region in non-ribosomal protein at 6 Å.

| Secondary Structure       | Number of Residues in Binding DOT Regions ( $N_{idt}$ ) | Number of Residues in DOT Region ( $N_d$ ) | Relative Binding Residues in DOT Regions |
|---------------------------|---------------------------------------------------------|--------------------------------------------|------------------------------------------|
| Helix                     | 58 (21.97)                                              | 288 (24.51)                                | 20.14                                    |
| Sheet                     | 49 (18.56)                                              | 145 (12.34)                                | 33.80                                    |
| Others (Coil, turn, bend) | 157 (59.47)                                             | 742 (63.15)                                | 21.16                                    |

300

Note: Percentage is mentioned in parenthesis. Relative binding in DOT regions are calculated by  $N_{idt}/N_d \times 100$ .

301

302

**Table S2.** Number of nucleotides in contact with DOT regions and complete protein and their percentages in non-ribosomal proteins, at 6 Å cutoff.

| Nucleotides | Number of Nucleotides in Contact with DOT Regions ( $N_{idt}$ ) | Number of Nucleotides in Contact with Any Residue of Proteins ( $N_{prot}$ ) | Relative Contacts in DOT Regions (%) |
|-------------|-----------------------------------------------------------------|------------------------------------------------------------------------------|--------------------------------------|
| A           | 49 (22.90)                                                      | 217 (25.35)                                                                  | 22.58                                |
| C           | 59 (27.57)                                                      | 219 (25.58)                                                                  | 26.94                                |
| G           | 67 (31.31)                                                      | 252 (29.44)                                                                  | 26.59                                |
| U           | 39 (18.22)                                                      | 168 (19.63)                                                                  | 23.21                                |

303

304

Note: Percentage is mentioned in parenthesis. Relative contact in DOT regions are calculated by  $N_{idt}/N_{prot} \times 100$ .

305

306

**Table S3.** Secondary structure of RNA interacting with DOT region in NR6 dataset.

| Nucleotide | Secondary Structure | Number of Nucleotides in Contact with DOT Regions ( $N_{idt}$ ) | Number of Nucleotides in Contact with Any Residue of Proteins ( $N_{prot}$ ) | Relative Contact in DOT Regions (%) |
|------------|---------------------|-----------------------------------------------------------------|------------------------------------------------------------------------------|-------------------------------------|
| A          | Unpaired            | 40 (18.78)                                                      | 168 (19.67)                                                                  | 23.81                               |
| A          | Basepaired          | 9 (4.23)                                                        | 43 (5.04)                                                                    | 20.93                               |
| A          | Pseudoknot          | 0 (0)                                                           | 0 (0)                                                                        | 0                                   |
| C          | Unpaired            | 23 (10.80)                                                      | 102 (11.94)                                                                  | 22.55                               |
| C          | Basepaired          | 35 (16.43)                                                      | 113 (13.23)                                                                  | 30.97                               |
| C          | Pseudoknot          | 1 (0.47)                                                        | 6 (0.70)                                                                     | 16.67                               |
| G          | Unpaired            | 28 (13.15)                                                      | 125 (14.64)                                                                  | 22.40                               |
| G          | Basepaired          | 37 (17.37)                                                      | 126 (14.75)                                                                  | 29.37                               |
| G          | Pseudoknot          | 1 (0.47)                                                        | 4 (0.47)                                                                     | 25.00                               |
| U          | Unpaired            | 27 (12.68)                                                      | 115 (13.47)                                                                  | 23.48                               |
| U          | Basepaired          | 12 (5.63)                                                       | 51 (5.97)                                                                    | 23.53                               |
| U          | Pseudoknot          | 0 (0)                                                           | 1 (0.12)                                                                     | 0                                   |
| All        | Unpaired            | 118 (55.40)                                                     | 510 (59.72)                                                                  | 23.14                               |
| All        | Basepaired          | 93 (43.66)                                                      | 333 (38.99)                                                                  | 27.93                               |
| All        | Pseudoknot          | 2 (0.94)                                                        | 11 (1.29)                                                                    | 18.18                               |

Note: Percentage is mentioned in parenthesis. Relative contact in DOT regions are calculated by

$$N_{idt}/N_{prot} \times 100.$$

307

308

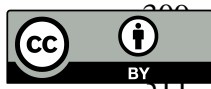

© 2018 by the authors. Submitted for possible open access publication under the terms and conditions of the Creative Commons Attribution (CC BY) license (<http://creativecommons.org/licenses/by/4.0/>).
